# Supplementary material for: Whole Genome Analysis of Two Novel Type 2 Porcine Reproductive and Respiratory Syndrome Viruses with Complex Genome Recombination between Lineage 8, 3, and 1 Strains Identified in Southwestern China
Source: PubMed Central journal article supplement (PMC6024730; doi:10.3390/v10060328), 2018-06-15
Supplement: viruses-10-00328-s001.pdf [file viruses-10-00328-s001.pdf]

**Supplementary Table S1.** Information on the 40 reference PRRSVs downloaded from GenBank.

| Reference strains | Country/year | Accession No. | Reference strains | Country/year | Accession No. |
|-------------------|--------------|---------------|-------------------|--------------|---------------|
| Lelystad virus    | EU/1991      | M96262        | HENAN-XINX        | CHN/2013     | KF611905      |
| VR-2332           | USA/1995     | AY150564      | JL580             | CHN/2013     | KR706343      |
| CH-1a             | CHN/1996     | AY032626      | XW015             | USA/2013     | KF724409      |
| BJ-4              | CHN/2000     | AF331831      | HLJA1             | CHN/2013     | KT351739      |
| HK14              | CHN/2004     | KF287141      | FJ1402            | CHN/2014     | KX169191      |
| RespPRRS MLV      | USA/2005     | AF066183      | JSWA              | CHN/2014     | KY373214      |
| JXA1              | CHN/2006     | EF112445      | HENXX-1           | CHN/2014     | KU950372      |
| jiangxi-3         | CHN/2007     | EU200961      | CHsx1401          | CHN/2014     | KP861625      |
| 07BJ              | CHN/2007     | FJ393459      | XJzx1-2015        | CHN/2015     | KX689233      |
| CH-1R             | CHN/2008     | EU807840      | HNjz15            | CHN/2015     | KT945017      |
| NADC30            | USA/2008     | JN654459      | FJZ03             | CHN/2015     | KP860909      |
| JXwn06            | CHN/2008     | EF641008      | HNyc15            | CHN/2015     | KT945018      |
| JXA1 P80          | CHN/2008     | FJ548853      | FJY04             | CHN/2015     | KP860910      |
| QY2010            | CHN/2010     | JQ743666      | WUH5              | CHN/2015     | KU523366      |
| QYYZ              | CHN/2010     | JQ308798      | HENZMD-9          | CHN/2015     | KU950374      |
| GM2               | CHN/2011     | JN662424      | TJnh1501          | CHN/2015     | KX510269      |
| WUH6              | CHN/2011     | KU523367      | 15ZJ1             | CHN/2015     | KX815432      |
| FJFS              | CHN/2012     | KP998476      | 15SC3             | CHN/2015     | KX815428      |
| HENAN-HEB         | CHN/2012     | KJ143621      | FJSD              | CHN/2015     | KP998474      |
| WUH4              | CHN/2012     | JQ326271      | HNhx              | CHN/2016     | KX766379      |
